# Supplementary material for: The Yeast Ess1 Prolyl Isomerase Controls Swi6 and Whi5 Nuclear Localization
Source: PubMed Central journal article supplement (PMC3962490; doi:10.1534/g3.113.008763), 2014-01-27
Supplement: supp_g3.113.008763_008763SI.pdf [file supp_g3.113.008763_008763SI.pdf]

## The yeast Ess1 prolyl isomerase controls Swi6 and Whi5 nuclear localization

David Atencio\*, Cassandra Barnes\*, Thomas M. Duncan\*, Ian M. Willis<sup>§</sup> and Steven D. Hanes\*

\*Department of Biochemistry and Molecular Biology, SUNY Upstate Medical University, Syracuse, NY 13210, <sup>§</sup>Department of Biochemistry, Albert Einstein College of Medicine, Bronx, NY 10461

Corresponding Author:

Steven D. Hanes, Ph.D.

Department of Biochemistry and Molecular Biology

SUNY Upstate Medical University

750 E. Adams St., Syracuse, NY 13210

[haness@upstate.edu](mailto:haness@upstate.edu)

(315) 464-9887

**DOI: 10.1534/g3.113.008763**

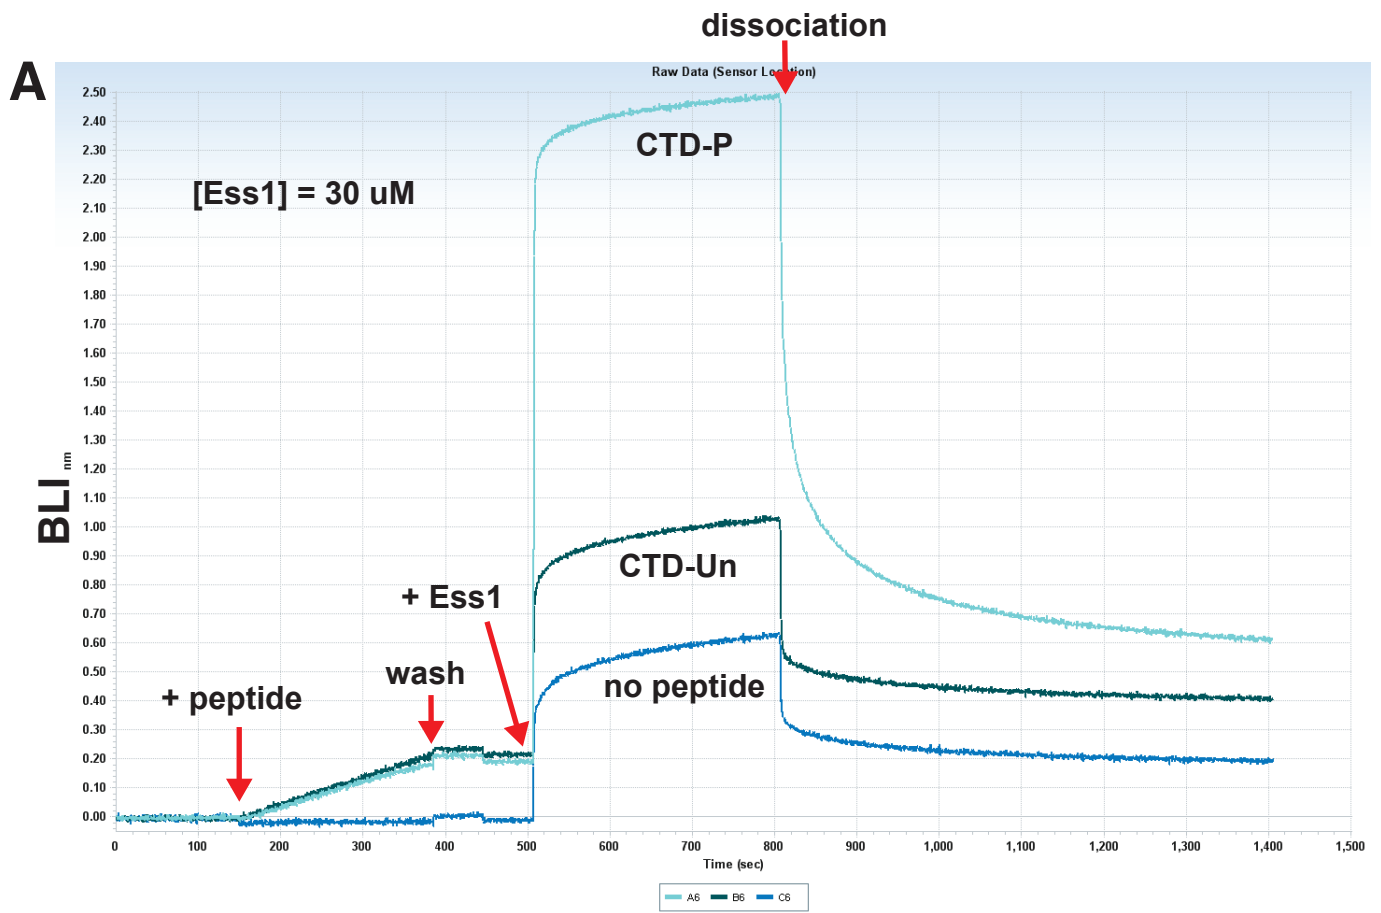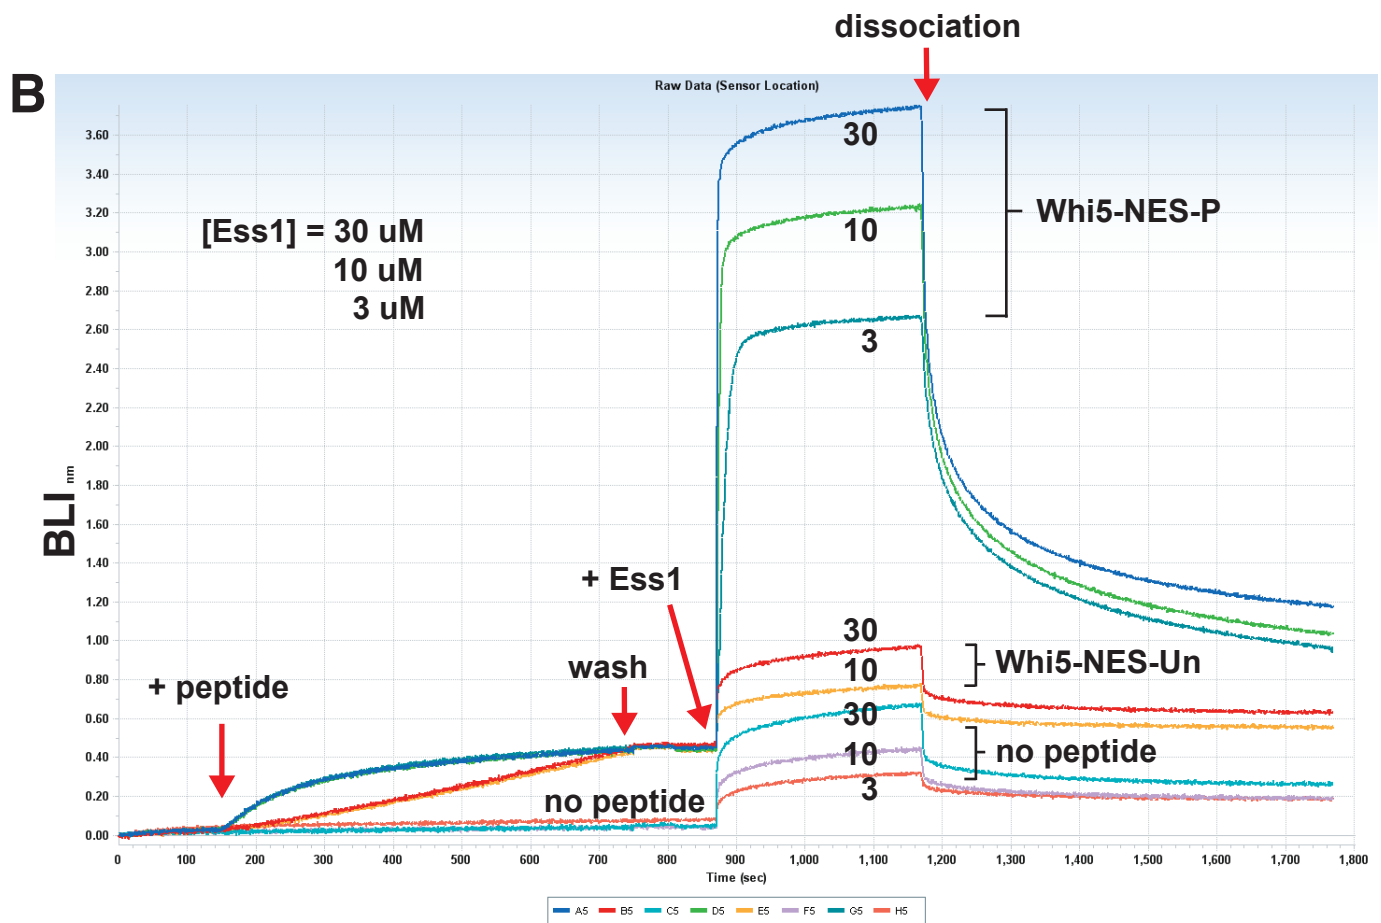

**Figure S1 Representative BLI experiments.** (A) Raw data for binding of purified Ess1 protein (30  $\mu$ M) to control peptides from RNA polymerase II CTD. Time of addition of biotinylated peptides (or no-peptide controls) to streptavidin-coated sensors is indicated by the arrow (**+ peptide**). After peptide binding, sensors were washed in buffer alone prior to transfer into buffer with Ess1 protein (**+Ess1**). Sensors with peptide and bound Ess1 were placed into fresh buffer (**dissociation**). (B) Example of raw data using peptides representing the nuclear export sequence (NES) of Whi5 at three concentrations of Ess1 as indicated. Samples A5, D5, and G5 are the Whi5-NES-P peptide with 30, 10, 3  $\mu$ M Ess1 protein, respectively. Samples B5 and E5 are Whi5-NES-UN peptide with 30 and 10  $\mu$ M Ess1 protein, respectively. Samples C5, F5, and H5 are “no-peptide-added” controls with 30, 10, 3  $\mu$ M Ess1 protein, respectively. Note that the no-peptide controls show increased (background) signal with higher Ess1 protein concentrations, as expected. For both panels **A** and **B**, the (**P**) indicates phospho-Ser peptides, (**Un**) indicates unphosphorylated peptides. Full peptide sequences are given in the main text (**Table 5**).

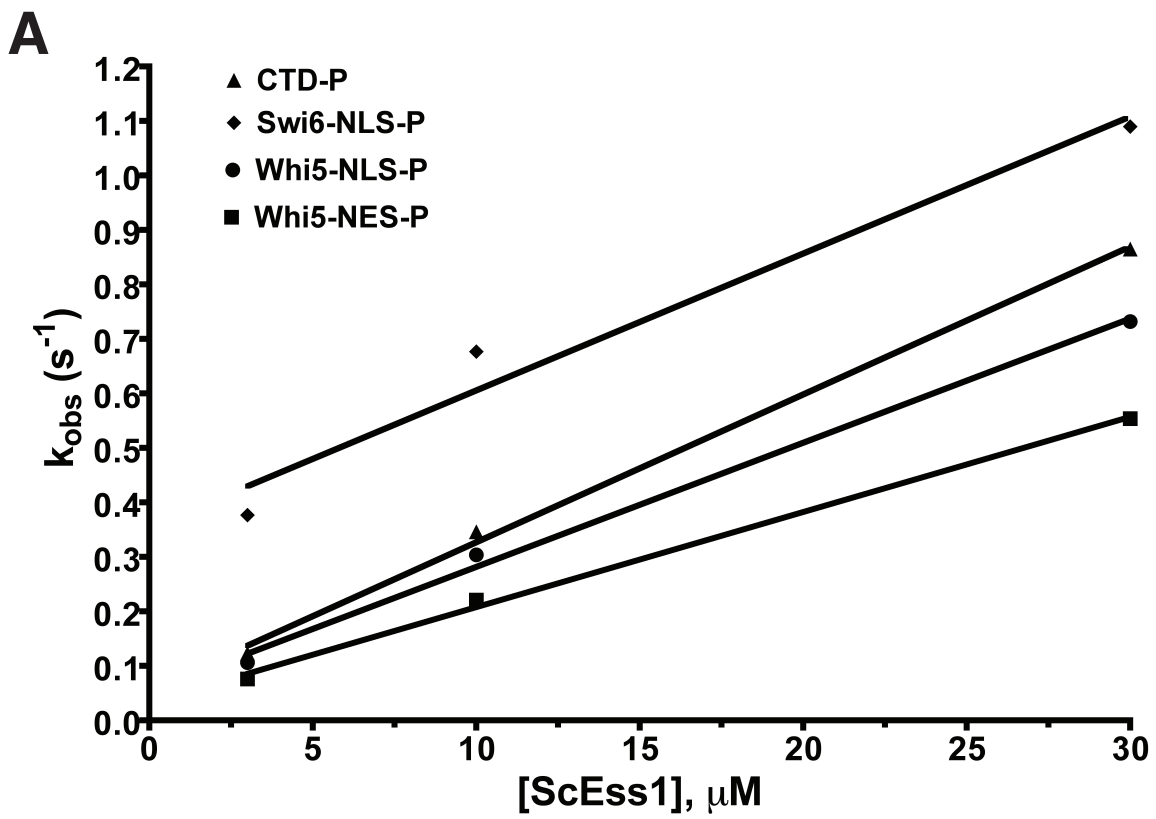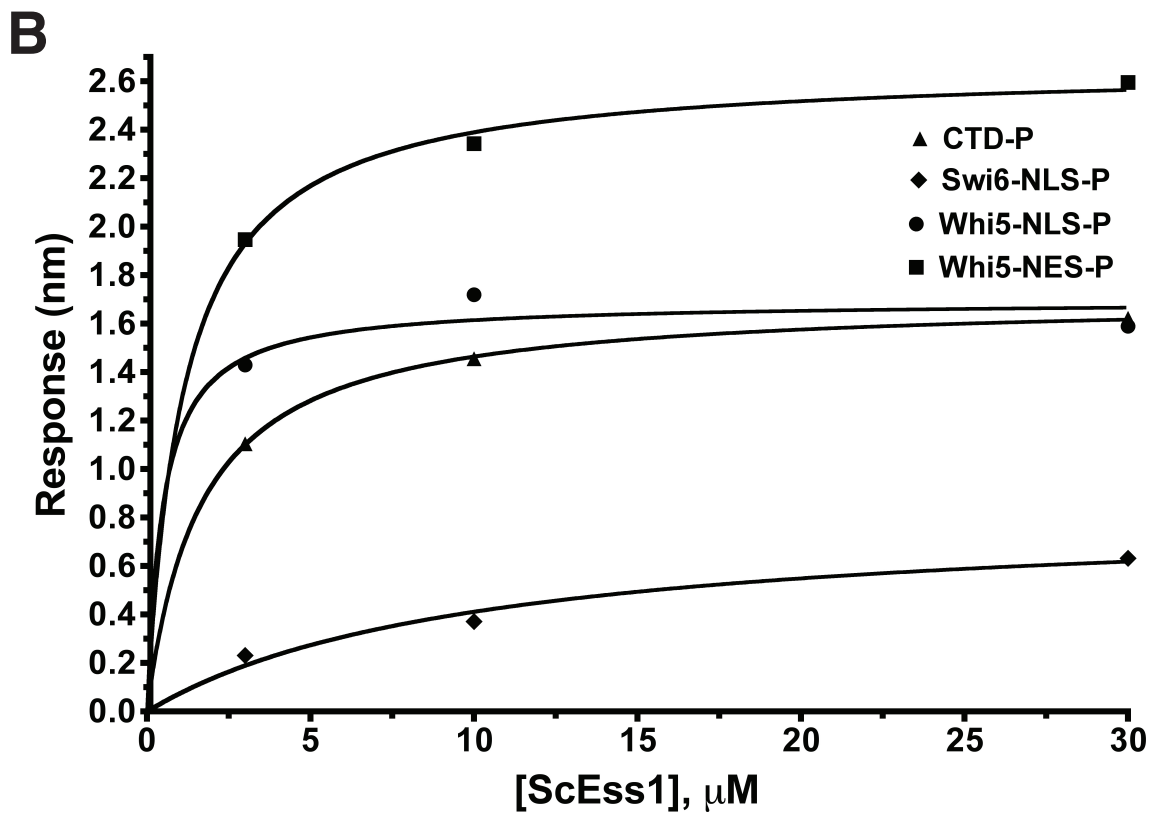

**Figure S2 Estimation of apparent  $K_d$  values for binding of Ess1 to peptides.** From the BLI kinetic assays of Ess1 binding with each peptide (Figure 6), regression analyses were used to determine the apparent dissociation constants ( $K_{app}$ ) for binding of Ess1 to each of the query peptides. (A) For each phosphorylated peptide, observed rates ( $k_{obs}$ ) for Ess1 association were plotted vs. the concentration of Ess1, and the slope provides an estimate of the 2<sup>nd</sup>-order association rate ( $k_a$ ,  $M^{-1} s^{-1}$ ), which is listed in Table S4. The kinetic estimate for  $K_D$  ( $K_{appK}$ , Table 5) was calculated as the ratio of  $k_d/k_a$  values from Table S4. (B) The plateau value for binding at each Ess1 concentration (Figure 6) was assumed to represent the amount of Ess1/peptide complex at equilibrium. For each phosphorylated peptide, these equilibrium binding responses were plotted vs. Ess1 concentration and fit to a hyperbolic binding isotherm to obtain the equilibrium estimate for  $K_D$  ( $K_{appEq}$ , Table 5).

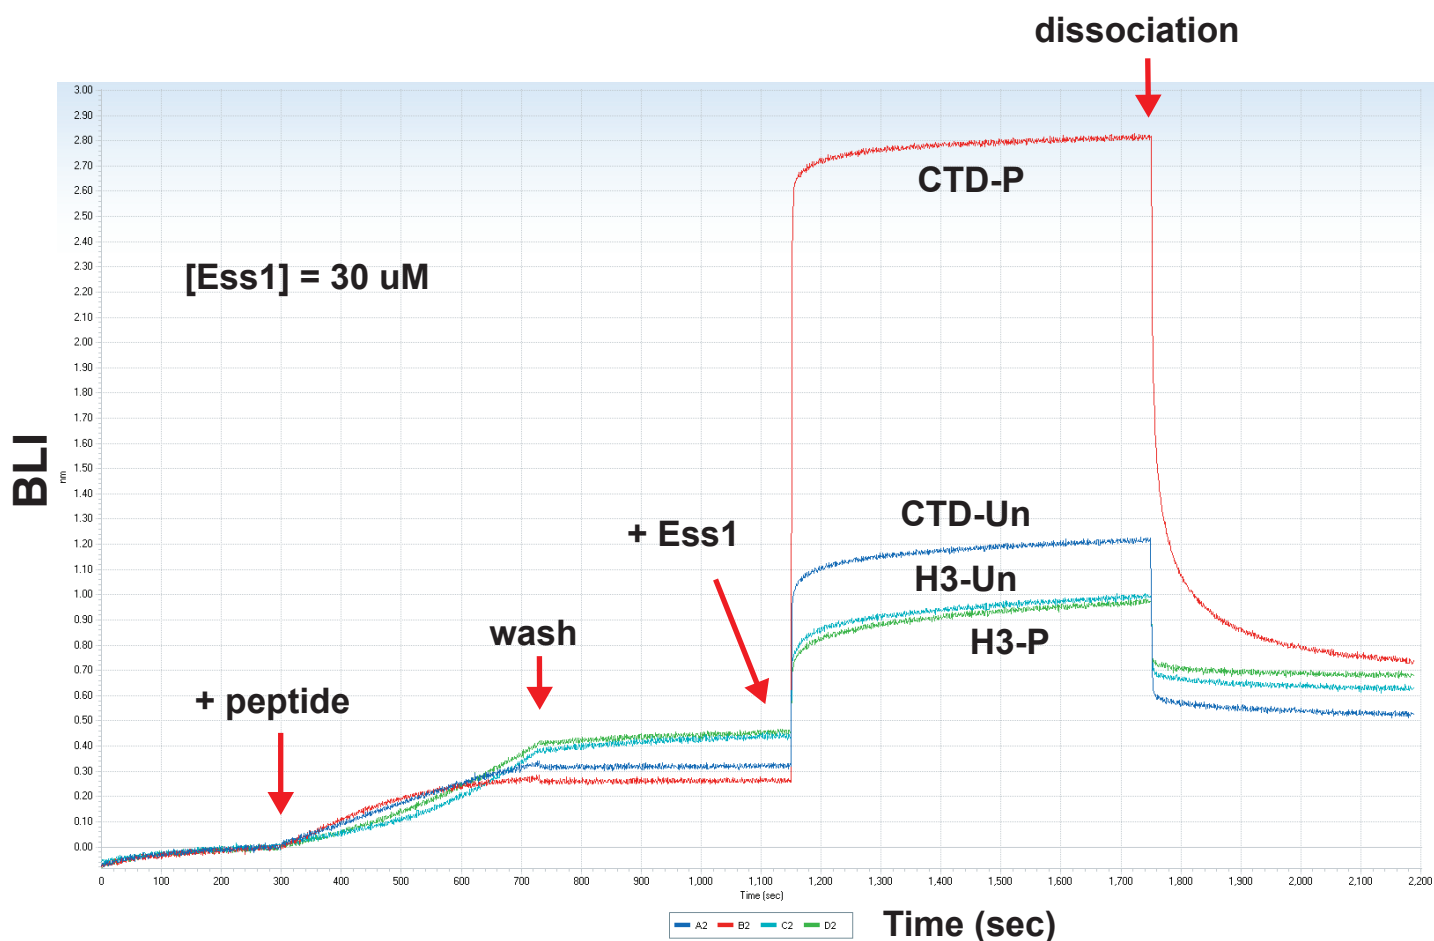

**Figure S3 BLI experiment testing Ess1 binding to non-substrate a phospho-peptide.** Raw data for binding of purified Ess1 protein (30  $\mu$ M) to control peptides from the RNA polymerase II CTD (as in Figure S1), and to non-substrate control peptides from Histone H3 residues 1-21. **H3-Un** is unphosphorylated, **H3-P** is phosphorylated at serine 10. Experiment is carried out as described in Legend to Figure S1. Histone peptides were from Millipore (cat # 12-403; 12-427) The sequences are ARTKQTARKSTGGKAPRKQLA-GGK-Biotin, with the Ser residue that is phosphorylated in peptide H3-P highlighted. Levels of Ess1 binding to both H3 peptides is essentially identical to binding to no-peptide added control samples (data not shown).

**Table S1 Oligonucleotides used in this study**

| Oligo Name | Sequence                                                       | Use                 | Gene      | reference       |
|------------|----------------------------------------------------------------|---------------------|-----------|-----------------|
| OW38       | CATAACCGACTACGGCAC                                             | strain construction | ESS1 5'-F | Ma et al., 2012 |
| OW989      | TGTTTACAAAAAATACAAGAATCCGTTACTAAAGATTCAGTATAGCGACC<br>AGCATTAC | strain construction | NAT-R     | Ma et al., 2012 |
| OW1534     | TTCGCGAAGTAACCCTTCGTGGA                                        | RT-qPCR control     | SNR6-F    | Ma et al., 2012 |
| OW1535     | GTAAAACGGTTCATCCTTATGCAG                                       | RT-qPCR control     | SNR6-R    | Ma et al., 2012 |
| UP007      | CAAGGTCACACTCCACTCCA                                           | RT-qPCR             | SWI4-F    | This study      |
| UP008      | GTAGTCCTGCTGACCCAAGC                                           | RT-qPCR             | SWI4-R    | This study      |
| UP009      | ACGACCGAGGTGAGTTATGG                                           | RT-qPCR             | SWI6-F    | This study      |
| UP010      | GCTTGCTCTGGCAGTATTC                                            | RT-qPCR             | SWI6-R    | This study      |
| UP011      | GGATGGACGGACAAGACACT                                           | RT-qPCR             | WHI5-F    | This study      |
| UP012      | TCCACTTCGGTATCCGACTC                                           | RT-qPCR             | WHI5-R    | This study      |
| UP013      | CCACGTCCGTATCTTCTCT                                            | RT-qPCR             | MBP1-F    | This study      |
| UP014      | ATATAGGGAGCGCTGTGTGG                                           | RT-qPCR             | MBP1-R    | This study      |
| UP015      | TTTACCCTCCGACGCTACTG                                           | RT-qPCR             | WHI3-F    | This study      |
| UP016      | CCTCCTTCTGCTGTTTGG                                             | RT-qPCR             | WHI3-R    | This study      |
| UP027      | TGACGATCCACTAGCGACTTC                                          | RT-qPCR             | CLN1-2-F  | This study      |
| UP028      | CTCGACCTGGCACCATTC                                             | RT-qPCR             | CLN1-2-R  | This study      |
| UP096      | ATTCGACTGCCTTGAGCTGT                                           | RT-qPCR             | CLB1-F    | This study      |
| UP097      | CCCATTCTACTCCTCCAGA                                            | RT-qPCR             | CLB1-R    | This study      |
| UP094      | ACACCCAAGATGAGGCATTC                                           | RT-qPCR             | HCM1-F    | This study      |
| UP095      | GGGTGCAGAGGACTTTCTTG                                           | RT-qPCR             | HCM1-R    | This study      |
| UP098      | TTGCCTGTTTCATTGCCTGTA                                          | RT-qPCR             | CLB6-F    | This study      |
| UP099      | GAATTTGGCCATGTTCTTG                                            | RT-qPCR             | CLB6-R    | This study      |
| UP100      | CCCATCATTGCGATAAAAGGT                                          | RT-qPCR             | POL1-F    | This study      |
| UP101      | ACGCTTACAAAAACGGAGA                                            | RT-qPCR             | POL1-R    | This study      |
| UP102      | TCAAGGAGGTCATGGAGGTC                                           | RT-qPCR             | SCJ1-F    | This study      |
| UP103      | CATCTGCAGAGCCACTACCA                                           | RT-qPCR             | SCJ1-R    | This study      |
| UP104      | GTCTATGAAGCAGCCCAAGC                                           | RT-qPCR             | HPR1-F    | This study      |
| UP105      | CATCCAACGCTTCCACTTTT                                           | RT-qPCR             | HPR1-R    | This study      |
| UP082      | TACATGGTCCATCGGCTGTA                                           | RT-qPCR             | CDC28-F   | This study      |
| P083       | TAGGTCTTTTCTGCGCCATT                                           | RT-qPCR             | CDC28-R   | This study      |
| P084       | TTTCTCCACCATTTGCCTTC                                           | RT-qPCR             | CLN3-F    | This study      |
| UP085      | TGAATTTGTGGGATGCTCA                                            | RT-qPCR             | CLN3-R    | This study      |

|       |                                                                        |                        |                                        |            |
|-------|------------------------------------------------------------------------|------------------------|----------------------------------------|------------|
| UP086 | CCAACCTTCTACGGCGAATA                                                   | RT-qPCR                | CDC14-F                                | This study |
| UP087 | TATCCTGCATGGATTCGTCA                                                   | RT-qPCR                | CDC14-R                                | This study |
| UP088 | AGAAAAGAACGTCGGGACTG                                                   | RT-qPCR                | NRM1-F                                 | This study |
| UP089 | ATACCATCCTGGCATGAGGA                                                   | RT-qPCR                | NRM1-R                                 | This study |
| UP090 | GTTTTAGCCGGAATATGGA                                                    | RT-qPCR                | CLN2-F                                 | This study |
| UP091 | CATTGGTTGCGTTATTGCTG                                                   | RT-qPCR                | CLN2-R                                 | This study |
| UP092 | CGAAGGATACCGCTATGGAA                                                   | RT-qPCR                | HSL1-F                                 | This study |
| UP093 | AGCATATGCGCATCATCAA                                                    | RT-qPCR                | HSL1-R                                 | This study |
| UP108 | TATCGTTGAATCAGGAAGCGGTGTTTCGTGTGATCAAGCGGGTAGGTGGTCC<br>ACGGATCCCCGGG  | strain<br>construction | ess1 <sup>H164R</sup> + YFP-<br>HIS3 F | This study |
| OW318 | GGGAATAAGAACATAAAAAAGGTGAGGTGGAGAAGCAAATGCCAACCATC<br>GATGAATTCGAGCTCG | strain<br>construction | ess1 <sup>H164R</sup> + YFP-<br>HIS3 R | This study |

F = forward; R = reverse

#### Tables S2-S3

Available for download at <http://www.g3journal.org/lookup/suppl/doi:10.1534/g3.113.008763/-/DC1>

**Table S2 Complete list of SGA interactions with *ess1*<sup>H164R</sup>.** 429 genetic interactions were identified after setting a calibrated P-value of between +0.2 to +1.0 (aggravating interactions), or – 0.2 to -1.0 (alleviating interactions).

**Table S3 Results of SlimMapper Gene Ontology (GO) analysis.** List shows functional categories of genes that interact with *ESS1* derived from the SGA using a calibrated P-value cutoff value of 0.25. Analysis was done using SlimMapper <http://www.yeastgenome.org/cgi-bin/GO/goSlimMapper.pl> and yeast GO-Slim:Process was used to sort genes into indicated functional categories.



**Table S4 Fitting Results for BLI Kinetic Assays**

| Peptide    | $k_a$ ( $M^{-1}s^{-1}$ ) $\pm$ SD | $k_d$ ( $s^{-1}$ ) $\pm$ SD | %Rmax $\pm$ SD |
|------------|-----------------------------------|-----------------------------|----------------|
| CTD-P      | 27100 $\pm$ 1220                  | 0.0923 $\pm$ 0.0274         | 71 $\pm$ 1     |
| Swi6-NLS-P | 25100 $\pm$ 4570                  | 0.2537 $\pm$ 0.0881         | 100            |
| Whi5-NLS-P | 22800 $\pm$ 1420                  | 0.0722 $\pm$ 0.0384         | 72 $\pm$ 1     |
| Whi5-NES-P | 17500 $\pm$ 830                   | 0.0503 $\pm$ 0.0144         | 64 $\pm$ 2     |

Summary of results for fitting curves of BLI kinetic data (**Fig. 6**). The dissociation rate ( $k_d$ ) is an average ( $\pm$ standard deviation (SD)) for fits at 3 concentrations of each peptide (3, 10, 30  $\mu$ M). With the exception of the Swi6-NLS-P peptide, dissociation appeared biphasic, and the largest portion of signal for bound Ess1 (%Rmax) dissociated with the  $k_d$  value is shown; a smaller portion appeared to dissociate at a slower rate, which might have been due to re-binding as the concentration of free peptide increased. For Swi6-NLS-P, dissociation was faster and monophasic; all signal for bound Ess1 dissociated with the  $k_d$  value shown. The  $k_a$  value for each peptide ( $\pm$ SD) was obtained from the slope in supplemental **Fig. S2** (the dependence of association kinetics ( $k_{obs}$ ) on the peptide concentration).
