# Supplementary material for: The Yeast Ess1 Prolyl Isomerase Controls Swi6 and Whi5 Nuclear Localization
Source: PubMed Central journal article supplement (PMC3962490; doi:10.1534/g3.113.008763), 2014-01-27
Supplement: supp_g3.113.008763_FigureS1.pdf [file supp_g3.113.008763_FigureS1.pdf]

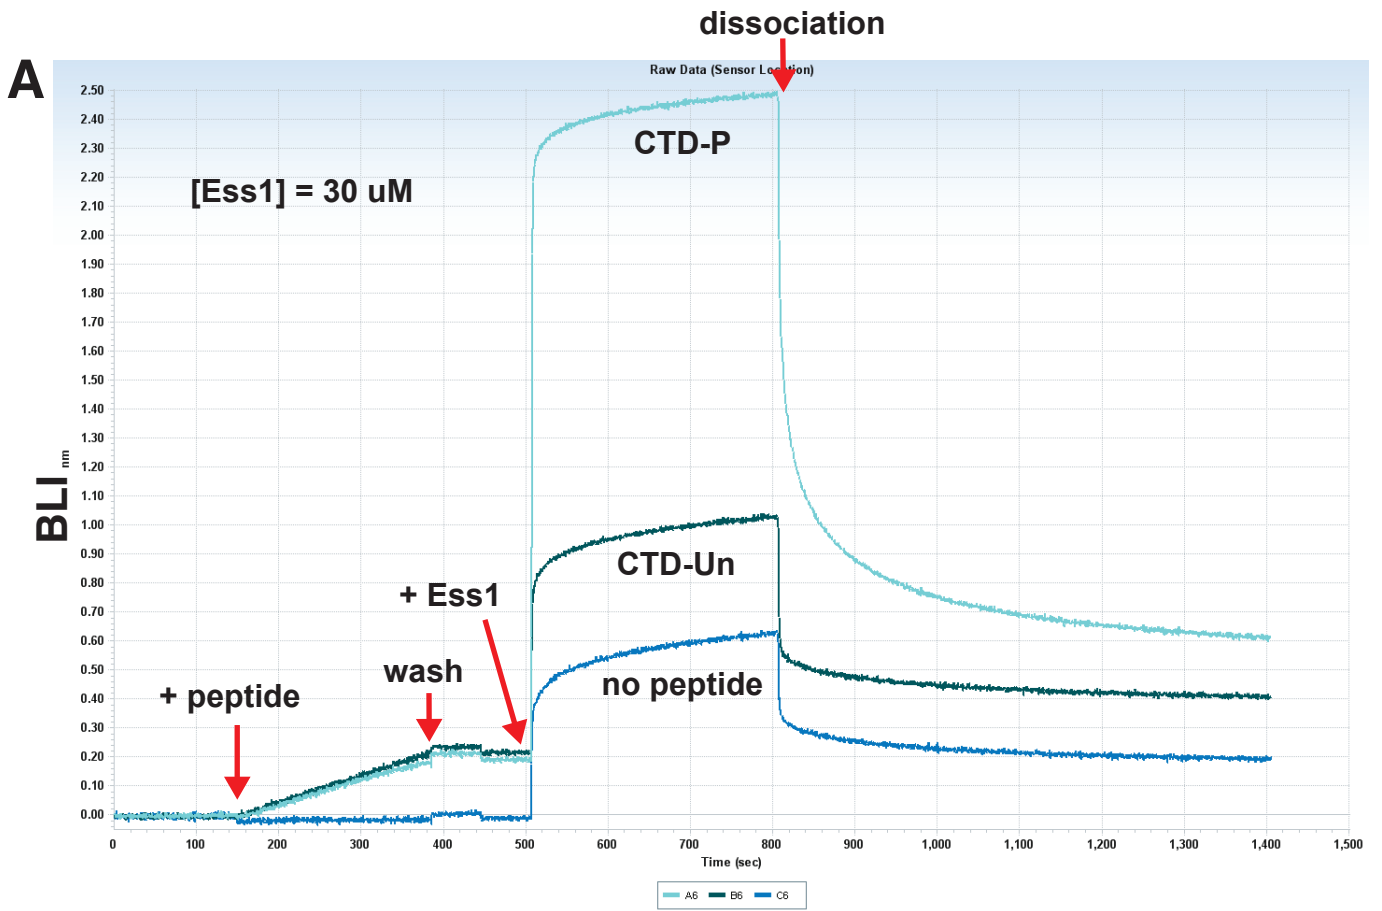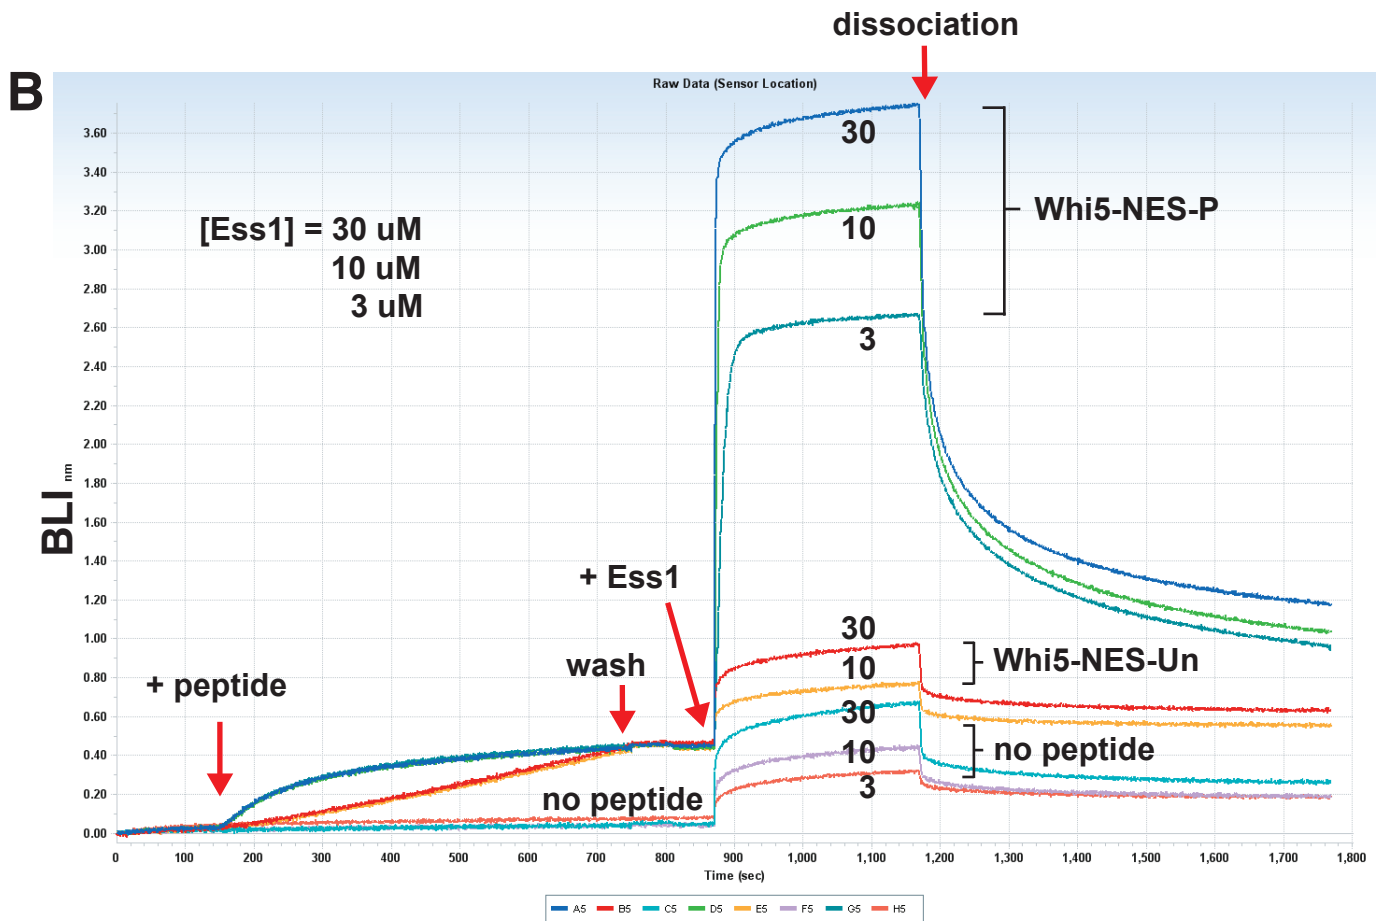

**Figure S1 Representative BLI experiments.** (A) Raw data for binding of purified Ess1 protein (30  $\mu$ M) to control peptides from RNA polymerase II CTD. Time of addition of biotinylated peptides (or no-peptide controls) to streptavidin-coated sensors is indicated by the arrow (**+ peptide**). After peptide binding, sensors were washed in buffer alone prior to transfer into buffer with Ess1 protein (**+Ess1**). Sensors with peptide and bound Ess1 were placed into fresh buffer (**dissociation**). (B) Example of raw data using peptides representing the nuclear export sequence (NES) of Whi5 at three concentrations of Ess1 as indicated. Samples A5, D5, and G5 are the Whi5-NES-P peptide with 30, 10, 3  $\mu$ M Ess1 protein, respectively. Samples B5 and E5 are Whi5-NES-UN peptide with 30 and 10  $\mu$ M Ess1 protein, respectively. Samples C5, F5, and H5 are “no-peptide-added” controls with 30, 10, 3  $\mu$ M Ess1 protein, respectively. Note that the no-peptide controls show increased (background) signal with higher Ess1 protein concentrations, as expected. For both panels **A** and **B**, the **(P)** indicates phospho-Ser peptides, **(Un)** indicates unphosphorylated peptides. Full peptide sequences are given in the main text (**Table 5**).
