# Supplementary material for: The Yeast Ess1 Prolyl Isomerase Controls Swi6 and Whi5 Nuclear Localization
Source: PubMed Central journal article supplement (PMC3962490; doi:10.1534/g3.113.008763), 2014-01-27
Supplement: supp_g3.113.008763_FigureS2.pdf [file supp_g3.113.008763_FigureS2.pdf]

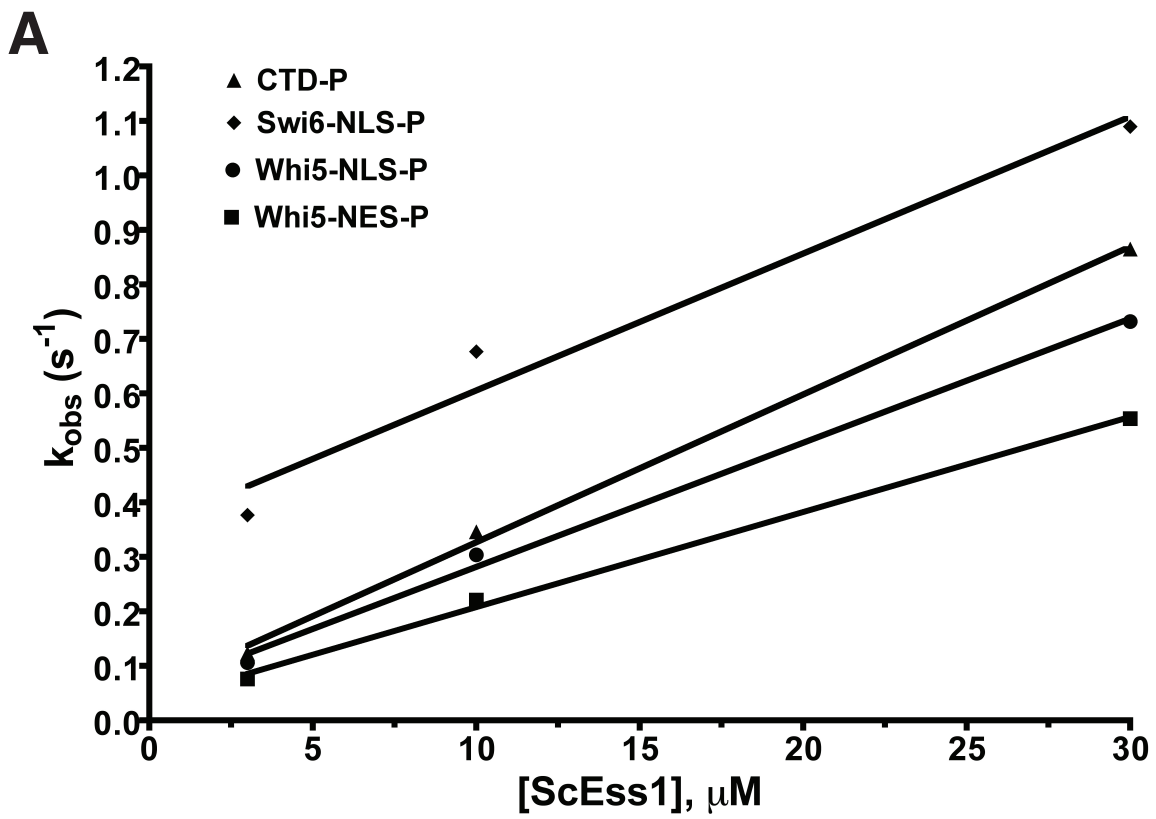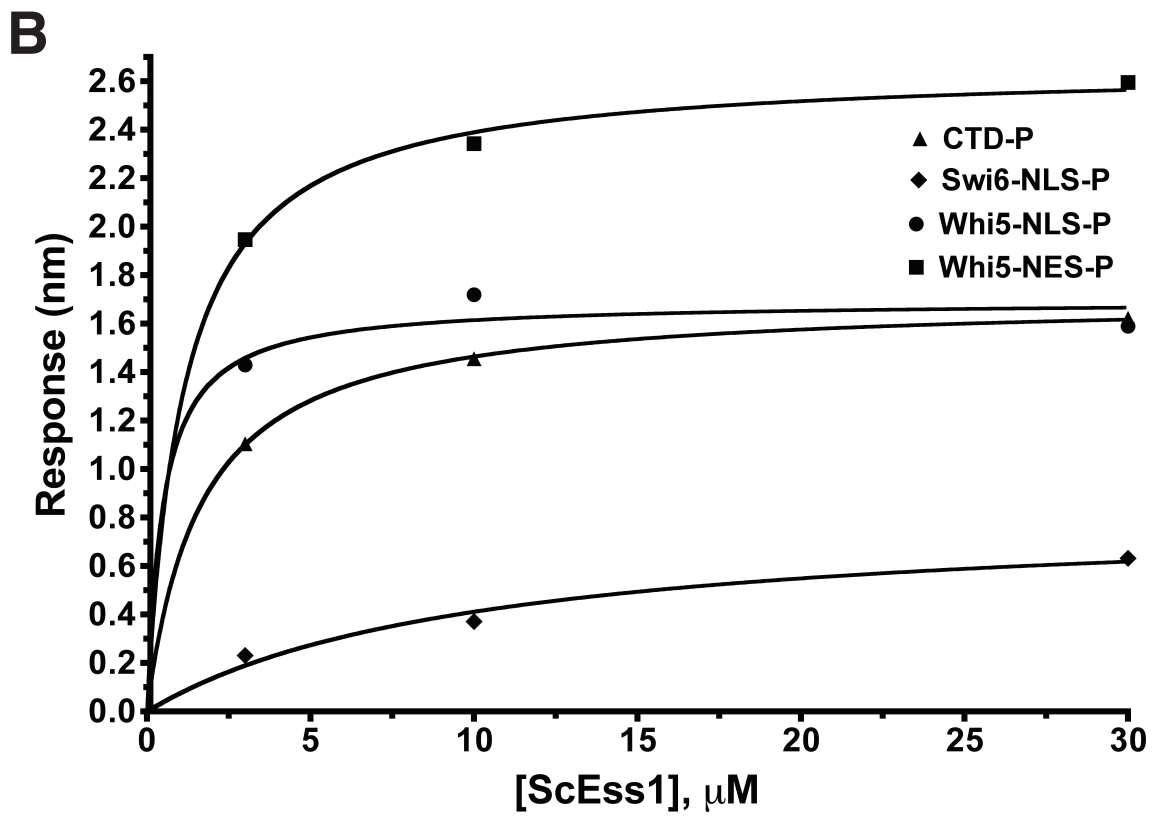

**Figure S2 Estimation of apparent  $K_d$  values for binding of Ess1 to peptides.** From the BLI kinetic assays of Ess1 binding with each peptide (Figure 6), regression analyses were used to determine the apparent dissociation constants ( $K_{app}$ ) for binding of Ess1 to each of the query peptides. (A) For each phosphorylated peptide, observed rates ( $k_{obs}$ ) for Ess1 association were plotted vs. the concentration of Ess1, and the slope provides an estimate of the 2<sup>nd</sup>-order association rate ( $k_a$ ,  $M^{-1} s^{-1}$ ), which is listed in Table S4. The kinetic estimate for  $K_D$  ( $K_{appK}$ , Table 5) was calculated as the ratio of  $k_d/k_a$  values from Table S4. (B) The plateau value for binding at each Ess1 concentration (Figure 6) was assumed to represent the amount of Ess1/peptide complex at equilibrium. For each phosphorylated peptide, these equilibrium binding responses were plotted vs. Ess1 concentration and fit to a hyperbolic binding isotherm to obtain the equilibrium estimate for  $K_D$  ( $K_{appEq}$ , Table 5).
