# Supplementary material for: The Yeast Ess1 Prolyl Isomerase Controls Swi6 and Whi5 Nuclear Localization
Source: PubMed Central journal article supplement (PMC3962490; doi:10.1534/g3.113.008763), 2014-01-27
Supplement: supp_g3.113.008763_FigureS3.pdf [file supp_g3.113.008763_FigureS3.pdf]

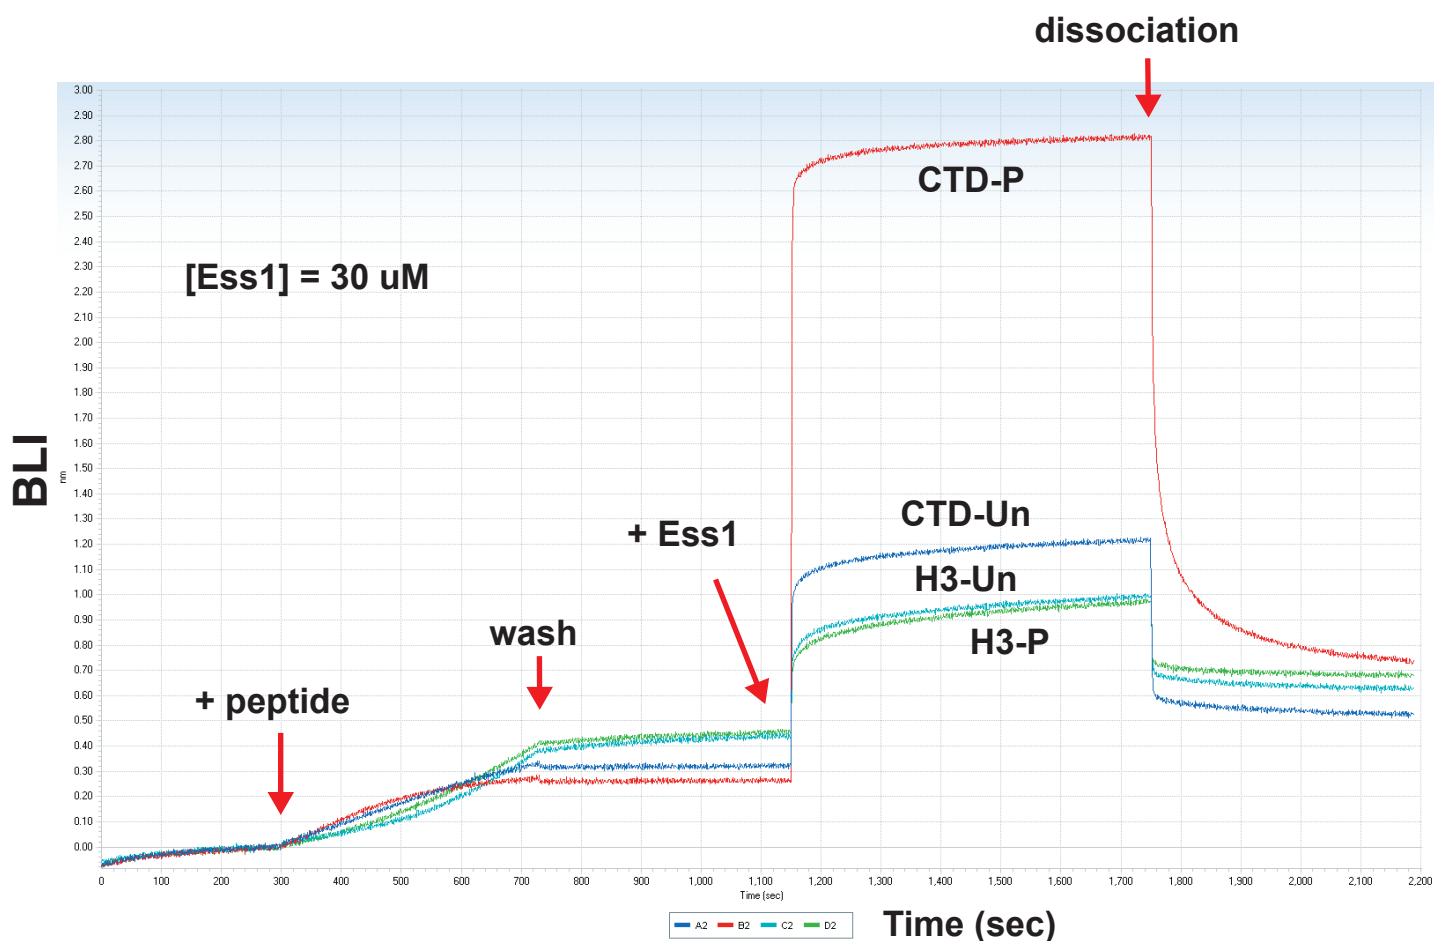

**Figure S3 BLI experiment testing Ess1 binding to non-substrate a phospho-peptide.** Raw data for binding of purified Ess1 protein (30 μM) to control peptides from the RNA polymerase II CTD (as in Figure S1), and to non-substrate control peptides from Histone H3 residues 1-21. **H3-Un** is unphosphorylated, **H3-P** is phosphorylated at serine 10. Experiment is carried out as described in Legend to Figure S1. Histone peptides were from Millipore (cat # 12-403; 12-427) The sequences are ARTKQTARKSTGGKAPRKQLA-GGK-Biotin, with the Ser residue that is phosphorylated in peptide H3-P highlighted. Levels of Ess1 binding to both H3 peptides is essentially identical to binding to no-peptide added control samples (data not shown).
