# Supplementary material for: The Yeast Ess1 Prolyl Isomerase Controls Swi6 and Whi5 Nuclear Localization
Source: PubMed Central journal article supplement (PMC3962490; doi:10.1534/g3.113.008763), 2014-01-27
Supplement: supp_g3.113.008763_TableS1.pdf [file supp_g3.113.008763_TableS1.pdf]

**Table S1 Oligonucleotides used in this study**

| Oligo Name | Sequence                                                       | Use                 | Gene      | reference       |
|------------|----------------------------------------------------------------|---------------------|-----------|-----------------|
| OW38       | CATAACCGACTACGGCAC                                             | strain construction | ESS1 5'-F | Ma et al., 2012 |
| OW989      | TGTTTACAAAAAATACAAGAATCCGTTACTAAAGATTCAGTATAGCGACC<br>AGCATTAC | strain construction | NAT-R     | Ma et al., 2012 |
| OW1534     | TTCGCGAAGTAACCCTTCGTGGA                                        | RT-qPCR control     | SNR6-F    | Ma et al., 2012 |
| OW1535     | GTAAAACGGTTCATCCTTATGCAG                                       | RT-qPCR control     | SNR6-R    | Ma et al., 2012 |
| UP007      | CAAGGTCACACTCCACTCCA                                           | RT-qPCR             | SWI4-F    | This study      |
| UP008      | GTAGTCCTGCTGACCCAAGC                                           | RT-qPCR             | SWI4-R    | This study      |
| UP009      | ACGACCGAGGTGAGTTATGG                                           | RT-qPCR             | SWI6-F    | This study      |
| UP010      | GCTTGCTCTGGCAGTATTC                                            | RT-qPCR             | SWI6-R    | This study      |
| UP011      | GGATGGACGGACAAGACACT                                           | RT-qPCR             | WHI5-F    | This study      |
| UP012      | TCCACTTCGGTATCCGACTC                                           | RT-qPCR             | WHI5-R    | This study      |
| UP013      | CCACGTCCGTATCTTCTCT                                            | RT-qPCR             | MBP1-F    | This study      |
| UP014      | ATATAGGGAGCGCTGTGTGG                                           | RT-qPCR             | MBP1-R    | This study      |
| UP015      | TTTACCCTCCGACGCTACTG                                           | RT-qPCR             | WHI3-F    | This study      |
| UP016      | CCTCCTTCTGTGTTTGG                                              | RT-qPCR             | WHI3-R    | This study      |
| UP027      | TGACGATCCACTAGCGACTTC                                          | RT-qPCR             | CLN1-2-F  | This study      |
| UP028      | CTCGACCTGGCACCATTC                                             | RT-qPCR             | CLN1-2-R  | This study      |
| UP096      | ATTCGACTGCCTTGAGCTGT                                           | RT-qPCR             | CLB1-F    | This study      |
| UP097      | CCCATTCTACTCCTCCAGA                                            | RT-qPCR             | CLB1-R    | This study      |
| UP094      | ACACCCAAGATGAGGCATTC                                           | RT-qPCR             | HCM1-F    | This study      |
| UP095      | GGGTGCAGAGGACTTTCTTG                                           | RT-qPCR             | HCM1-R    | This study      |
| UP098      | TTGCCTGTTTCATTGCCTGTA                                          | RT-qPCR             | CLB6-F    | This study      |
| UP099      | GAATTTGGCCATGTTCTTG                                            | RT-qPCR             | CLB6-R    | This study      |
| UP100      | CCCATCATTGCGATAAAAGGT                                          | RT-qPCR             | POL1-F    | This study      |
| UP101      | ACGCTTACAAAAACGGAGA                                            | RT-qPCR             | POL1-R    | This study      |
| UP102      | TCAAGGAGGTCATGGAGGTC                                           | RT-qPCR             | SCJ1-F    | This study      |
| UP103      | CATCTGCAGAGCCACTACCA                                           | RT-qPCR             | SCJ1-R    | This study      |
| UP104      | GTCTATGAAGCAGCCCAAGC                                           | RT-qPCR             | HPR1-F    | This study      |
| UP105      | CATCCAACGCTTCCACTTTT                                           | RT-qPCR             | HPR1-R    | This study      |
| UP082      | TACATGGTCCATCGGCTGTA                                           | RT-qPCR             | CDC28-F   | This study      |
| P083       | TAGGTCTTTTCTGCGCCATT                                           | RT-qPCR             | CDC28-R   | This study      |
| P084       | TTTCTCCACCATTTGCCTTC                                           | RT-qPCR             | CLN3-F    | This study      |
| UP085      | TGAATTTGTGGGATGCTCA                                            | RT-qPCR             | CLN3-R    | This study      |

|       |                                                                        |                        |                                        |            |
|-------|------------------------------------------------------------------------|------------------------|----------------------------------------|------------|
| UP086 | CCAACCTTCTACGGCGAATA                                                   | RT-qPCR                | CDC14-F                                | This study |
| UP087 | TATCCTGCATGGATTCGTCA                                                   | RT-qPCR                | CDC14-R                                | This study |
| UP088 | AGAAAAGAACGTCGGGACTG                                                   | RT-qPCR                | NRM1-F                                 | This study |
| UP089 | ATACCATCCTGGCATGAGGA                                                   | RT-qPCR                | NRM1-R                                 | This study |
| UP090 | GTTTTAGCCGGAATATGGA                                                    | RT-qPCR                | CLN2-F                                 | This study |
| UP091 | CATTGGTTGCGTTATTGCTG                                                   | RT-qPCR                | CLN2-R                                 | This study |
| UP092 | CGAAGGATACCGCTATGGAA                                                   | RT-qPCR                | HSL1-F                                 | This study |
| UP093 | AGCATATGCGCATCATCAA                                                    | RT-qPCR                | HSL1-R                                 | This study |
| UP108 | TATCGTTGAATCAGGAAGCGGTGTTTCGTGTGATCAAGCGGGTAGGTGGTCC<br>ACGGATCCCCGGG  | strain<br>construction | ess1 <sup>H164R</sup> + YFP-<br>HIS3 F | This study |
| OW318 | GGGAATAAGAACATAAAAAAGGTGAGGTGGAGAAGCAAATGCCAACCATC<br>GATGAATTCGAGCTCG | strain<br>construction | ess1 <sup>H164R</sup> + YFP-<br>HIS3 R | This study |

F = forward; R = reverse

#### Tables S2-S3

Available for download at <http://www.g3journal.org/lookup/suppl/doi:10.1534/g3.113.008763/-/DC1>

**Table S2 Complete list of SGA interactions with *ess1*<sup>H164R</sup>.** 429 genetic interactions were identified after setting a calibrated P-value of between +0.2 to +1.0 (aggravating interactions), or – 0.2 to -1.0 (alleviating interactions).

**Table S3 Results of SlimMapper Gene Ontology (GO) analysis.** List shows functional categories of genes that interact with *ESS1* derived from the SGA using a calibrated P-value cutoff value of 0.25. Analysis was done using SlimMapper <http://www.yeastgenome.org/cgi-bin/GO/goSlimMapper.pl> and yeast GO-Slim:Process was used to sort genes into indicated functional categories.
