# Supplementary material for: The Yeast Ess1 Prolyl Isomerase Controls Swi6 and Whi5 Nuclear Localization
Source: PubMed Central journal article supplement (PMC3962490; doi:10.1534/g3.113.008763), 2014-01-27
Supplement: supp_g3.113.008763_TableS4.pdf [file supp_g3.113.008763_TableS4.pdf]

**Table S4 Fitting Results for BLI Kinetic Assays**

| Peptide    | $k_a$ ( $M^{-1}s^{-1}$ ) $\pm$ SD | $k_d$ ( $s^{-1}$ ) $\pm$ SD | %Rmax $\pm$ SD |
|------------|-----------------------------------|-----------------------------|----------------|
| CTD-P      | 27100 $\pm$ 1220                  | 0.0923 $\pm$ 0.0274         | 71 $\pm$ 1     |
| Swi6-NLS-P | 25100 $\pm$ 4570                  | 0.2537 $\pm$ 0.0881         | 100            |
| Whi5-NLS-P | 22800 $\pm$ 1420                  | 0.0722 $\pm$ 0.0384         | 72 $\pm$ 1     |
| Whi5-NES-P | 17500 $\pm$ 830                   | 0.0503 $\pm$ 0.0144         | 64 $\pm$ 2     |

Summary of results for fitting curves of BLI kinetic data (**Fig. 6**). The dissociation rate ( $k_d$ ) is an average ( $\pm$ standard deviation (SD)) for fits at 3 concentrations of each peptide (3, 10, 30  $\mu$ M). With the exception of the Swi6-NLS-P peptide, dissociation appeared biphasic, and the largest portion of signal for bound Ess1 (%Rmax) dissociated with the  $k_d$  value is shown; a smaller portion appeared to dissociate at a slower rate, which might have been due to re-binding as the concentration of free peptide increased. For Swi6-NLS-P, dissociation was faster and monophasic; all signal for bound Ess1 dissociated with the  $k_d$  value shown. The  $k_a$  value for each peptide ( $\pm$ SD) was obtained from the slope in supplemental **Fig. S2** (the dependence of association kinetics ( $k_{obs}$ ) on the peptide concentration).
